# Supplementary material
Source: PubMed Central journal article supplement (PMC5423139)
Supplement: MOL2-10-610-s002.pdf [file MOL2-10-610-s002.pdf]

## Supplementary Figure 2

**A**

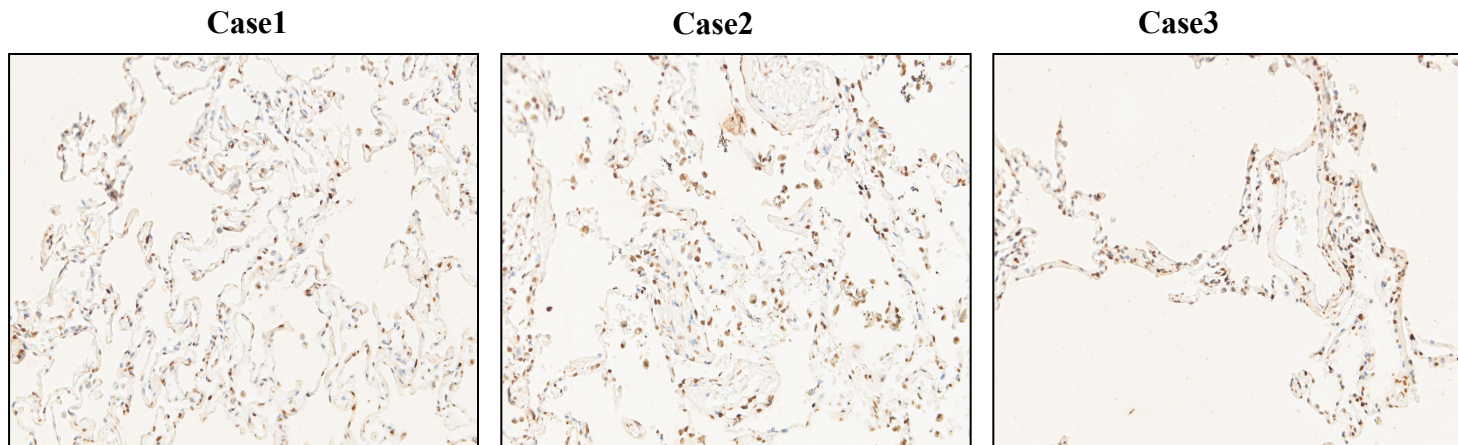

**B**

**COX-2 protein expression in 75 lung cancer patients from T stage**

| T Stage | -/+<br>(%) | +/+/+/+/+/+<br>(%) | P Value |
|---------|------------|--------------------|---------|
| T1      | 5 (23.8)   | 16 (76.2)          |         |
| T2      | 13 (31.7)  | 28 (68.3)          | 0.553   |
| T3      | 4 (50)     | 4 (50)             |         |
| T4      | 1 (20)     | 4 (80)             |         |
