# Supplementary material
Source: PubMed Central journal article supplement (PMC5423139)

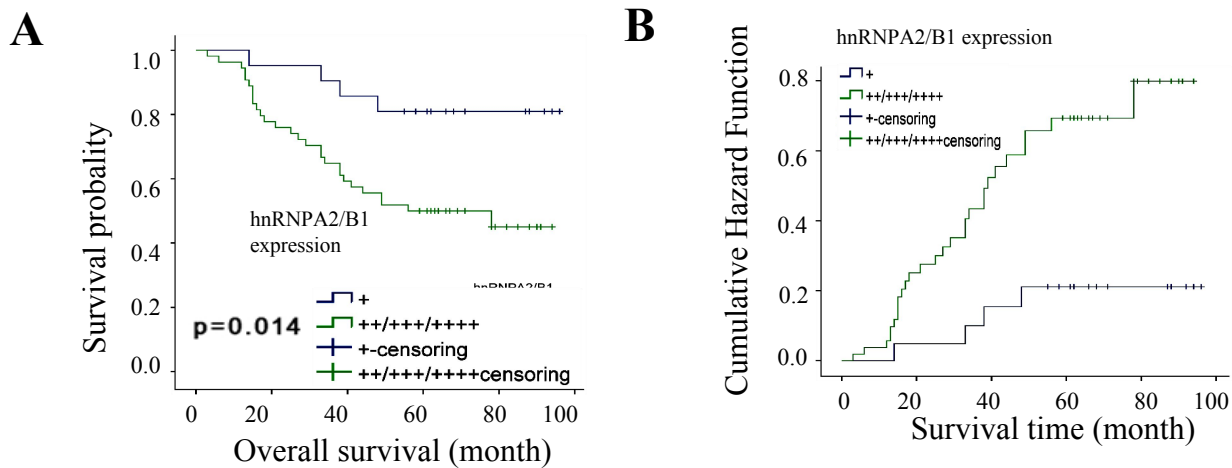

Supplement: MOL2-10-610-s001.pdf [file MOL2-10-610-s001.pdf]

# Supplementary Figure 3

**A**

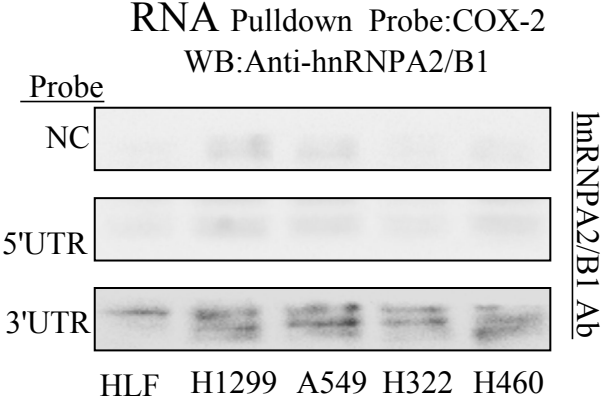

**B**

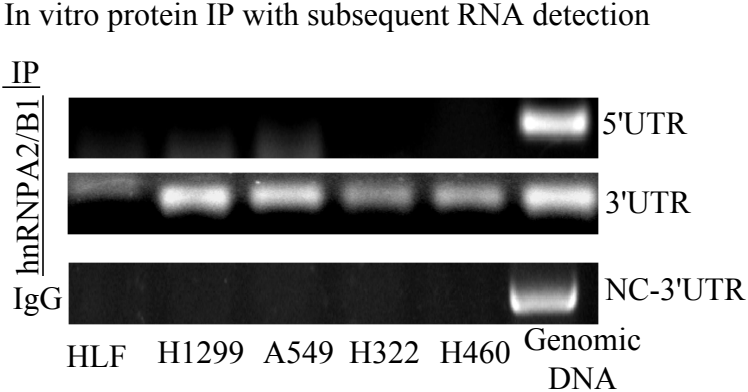

Supplement: MOL2-10-610-s003.pdf [file MOL2-10-610-s003.pdf]

# Supplementary Figure 4

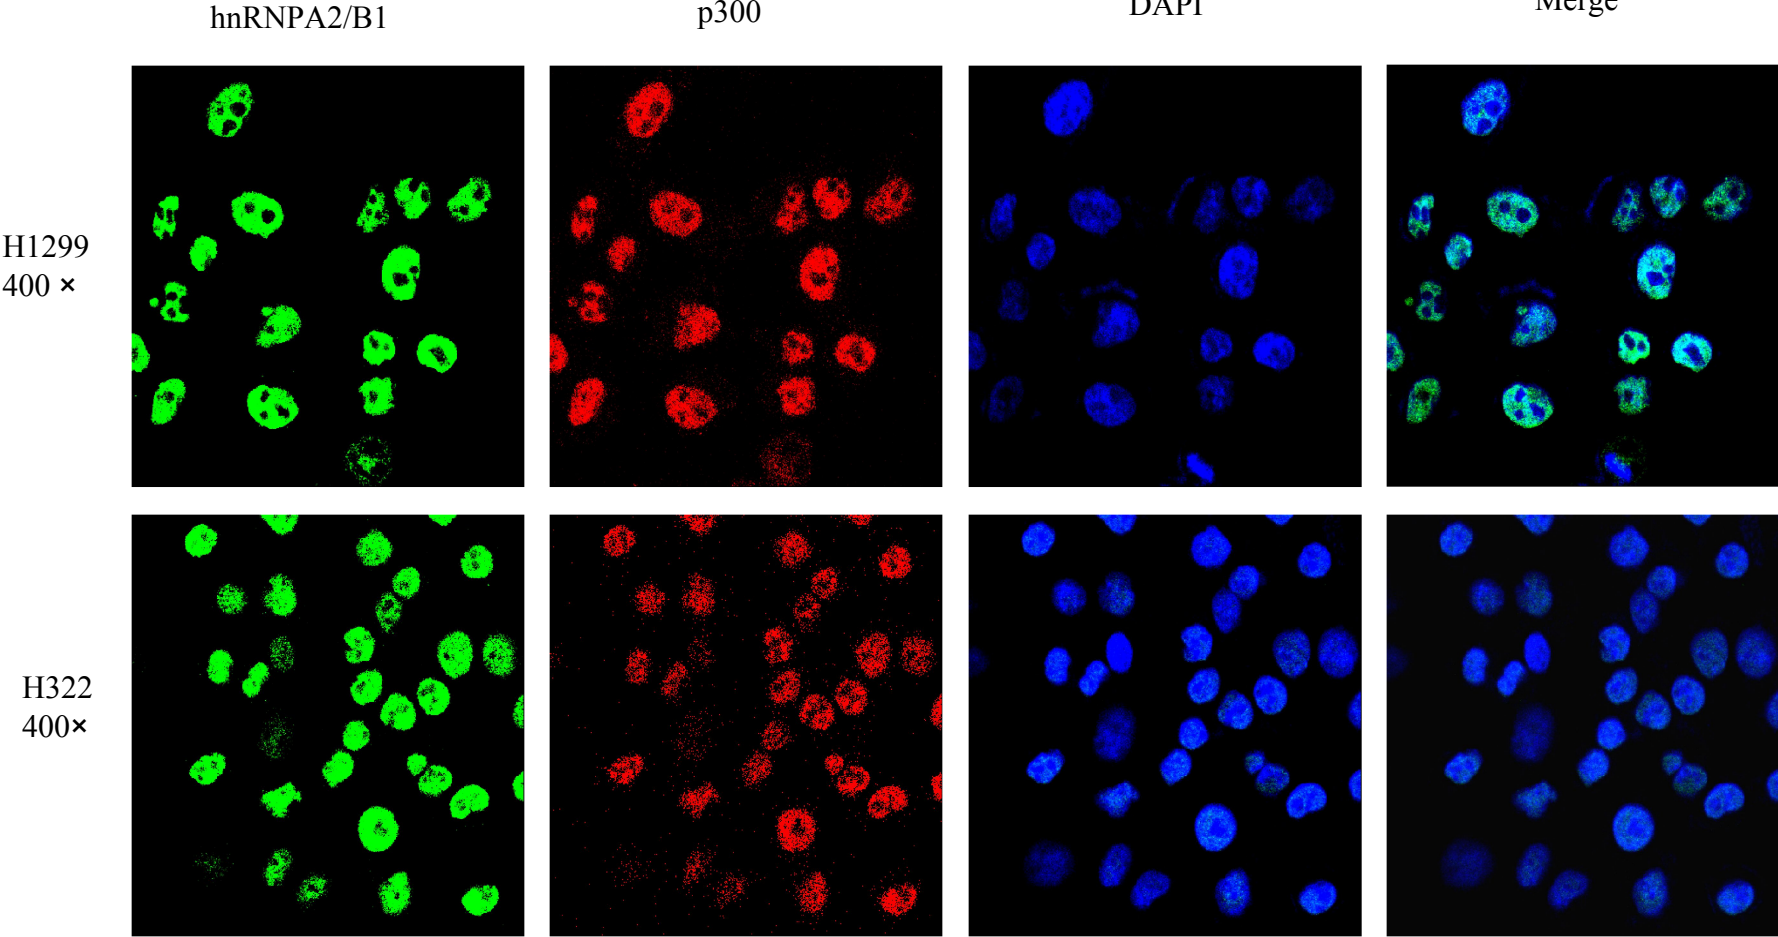

Supplement: MOL2-10-610-s004.pdf [file MOL2-10-610-s004.pdf]
